# Supplementary material for: Protection against LPS-induced cartilage inflammation and degradation provided by a biological extract of Mentha spicata
Source: BMC Complement Altern Med. 2010 May 11;10:19. doi: 10.1186/1472-6882-10-19 (PMC2874512; doi:10.1186/1472-6882-10-19)
Supplement: Additional file 1 — Table: Effects of 24-hour LPS treatment [0 or 3 μg/mL] on explants conditioned with CMsim, RA, CO, CA, and FA, and unconditioned control explants. [file 1472-6882-10-19-S1.DOC]

**Table 2 – Effects of 24-hour LPS treatment (0 or 3 µg/mL) on explants conditioned with CMsim, RA, CO, CA, and FA, and unconditioned control explants.**

Letters represents values significantly (p<0.05) different from unconditioned controls under the same stimulatory conditions.

| **Treatment** | **Dose (µg/mL)** | **N** | **PGE2 (pg/mL)** | | | **GAG (µg/mL)** | | | **NO (µg/mL)** | | **C-AM:EthD-1** | |
| --- | --- | --- | --- | --- | --- | --- | --- | --- | --- | --- | --- | --- |
| LPS Dose (*µg/mL*) | | | LPS Dose (*µg/mL*) | | | LPS Dose (*µg/mL*) | | LPS Dose (*µg/mL*) | |
| 0 | | 3 | 0 | | 3 | 0 | 3 | 0 | 3 |
| **Unconditioned control** | 0.00 | **6** | 189.9  5.6 | | 838.3  201.8 | 86.4  12.9 | 156.2  28.0 | | 0.43  0.07 | 1.09  0.29 | 337.5  21.8 | 334.9  39.7 |
| **RA** | 0.34 | **6** | 174.6  3.9 | | 745.1  180.6 | 87.7  11.2 | 106.2a  10.4 | | 0.65  0.14 | 1.00  0.12 | 305.5  28.5 | 250.9  15.5 |
| **CO** | 0.032 | **6** | 192.7  7.5 | | 874.1  234.2 | 76.6  19.0 | 129.6  12.7 | | 0.47  0.10 | 1.12  0.16 | 263.2  19.6a | 226.7  17.3 |
| **FA** | 0.023 | **6** | 203.1  8.1 | | 862.2  179.0 | 78.9  17.7 | 123.7  14.0 | | 0.54  0.16 | 1.16  0.11 | 284.5  24.7 | 263.7  17.0 |
| **CA** | 0.227 | **6** | 190.0  6.4 | | 984.0  371.5 | 91.9  16.5 | 125.2  15.5 | | 0.59  0.12 | 1.15  0.12 | 288.9  22.0 | 255.0  19.5 |
| **CMsim** | 144 | **6** | 166.6  6.8 | | 961.6  270.1 | 78.8  12.4 | 125.5  12.0 | | 0.37  0.08 | 0.91  0.18 | 310.3  29.9 | 299.8  42.6 |
| 720 | **6** | 160.9  3.8 | 667.9  138.5 | | 76.6  14.7 | 144.1  16.0 | | 0.32  0.10 | 1.00  0.07 | 318.9  27.4 | 303.1  17.1 |
| 1440 | **6** | 179.2  3.1 | 667.9  138.5 | | 101.4  14.6 | 137.3  9.6 | | 0.54  0.12 | 1.57  0.41 | 298.5  32.4 | 249.8  20.9 |
